# Supplementary material for: Fe3(BF)3(CO)8 structures with face-semibridging fluoroborylene ligands and a bicapped tetrahedral Fe3B3 cluster isoelectronic with Os6(CO)18
Source: Royal Society of Chemistry journal article supplement (doi:10.1039/c0nj00382d), 2010-01-01
Supplement: c0nj0038d.pdf [file c0nj0038d.pdf]

# **Fe<sub>3</sub>(BF)<sub>3</sub>(CO)<sub>8</sub> Structures with Face-Semibridging Fluoroborylene Ligands and a Bicapped Tetrahedral Fe<sub>3</sub>B<sub>3</sub> Cluster Isoelectronic with Os<sub>6</sub>(CO)<sub>18</sub>**

Liancai Xu,<sup>a</sup> Qian-shu Li,<sup>\*a,b</sup> Yaoming Xie,<sup>c</sup>  
R. Bruce King,<sup>\*a,c</sup> and Henry F. Schaefer III<sup>c</sup>

<sup>a</sup>Center for Computational Quantum Chemistry, South China Normal University,  
Guangzhou 510631, P. R. China

<sup>b</sup>Institute of Chemical Physics, Beijing Institute of Technology, Beijing 100081, P. R.  
China

<sup>c</sup>Department of Chemistry and Center for Computational Chemistry, University of  
Georgia, Athens, Georgia 30602, USA

## **Supporting Information**

**Tables S1-S3:** Theoretical harmonic vibrational frequencies for Fe<sub>3</sub>(BF)<sub>3</sub>(CO)<sub>8</sub> (15 structures) from B3LYP/DZP.

**Tables S4-S18:** Theoretical Cartesian coordinates for Fe<sub>3</sub>(BF)<sub>3</sub>(CO)<sub>8</sub> (15 structures), using BP86/DZP method.

**Table S19** Wiberg bond indices from NBO analysis for 8-1S, 9-1S and Fe(BF)(CO)<sub>4</sub>.

**Complete Gaussian 03 reference** (reference 44).

**Table S1.** Theoretical harmonic vibrational frequencies (in  $\text{cm}^{-1}$ ) for optimized structures of  $\text{Fe}_3(\text{BF})_3(\text{CO})_8$  using the BP86/DZP method (infrared intensities in parentheses are in  $\text{km/mol}$ ).

| 8-1S( $C_s$ )  | 8-2S( $C_{2v}$ )             | 8-3S( $C_s$ )  | 8-4S( $C_1$ )  | 8-5S( $C_s$ )  |
|----------------|------------------------------|----------------|----------------|----------------|
| 11.5(a",0.0)   | 22.0(b <sub>2</sub> ,0.0)    | 16.3(a",0.1)   | 9.7 (a, 0.1)   | 24.2i(a",0.0)  |
| 33.9(a",0.0)   | 27.0(a <sub>2</sub> ,0.0)    | 24.6(a",0.1)   | 38.7 (a, 0.1)  | 28.9(a',0.1)   |
| 42.6(a",0.0)   | 45.0(b <sub>2</sub> ,0.0)    | 39.9(a",0.1)   | 53.3 (a, 0.1)  | 48.0(a",0.0)   |
| 50.7(a",0.0)   | 56.3(b <sub>2</sub> ,0.1)    | 48.8(a",0.0)   | 54.6 (a, 0.0)  | 49.4(a',0.0)   |
| 56.1(a',0.2)   | 59.1(a <sub>2</sub> ,0.0)    | 55.4(a',0.2)   | 56.1 (a, 0.0)  | 54.2(a",0.0)   |
| 69.8(a",0.0)   | 70.5(a <sub>1</sub> ,0.0)    | 65.8(a',0.5)   | 74.6 (a, 0.0)  | 66.7(a",0.0)   |
| 72.7(a',0.2)   | 73.6(b <sub>1</sub> ,0.0)    | 68.6(a",0.1)   | 78.0 (a, 0.0)  | 71.4(a',0.0)   |
| 80.2(a",0.5)   | 82.9(a <sub>2</sub> ,0.0)    | 77.7(a",0.2)   | 79.2 (a, 0.0)  | 78.6(a',0.3)   |
| 83.9(a',0.1)   | 83.7(b <sub>2</sub> ,0.4)    | 84.8(a',0.0)   | 86.2 (a, 0.1)  | 83.8(a',0.1)   |
| 84.2(a",0.1)   | 90.3(a <sub>1</sub> ,0.0)    | 84.9(a',0.6)   | 89.7 (a, 0.1)  | 87.9(a",0.2)   |
| 89.4(a',0.0)   | 93.0(b <sub>1</sub> ,0.0)    | 88.2(a",0.1)   | 91.6 (a, 0.1)  | 90.8(a',0.0)   |
| 93.9(a",0.0)   | 93.0(a <sub>1</sub> ,0.1)    | 91.3(a",0.1)   | 92.8 (a, 0.1)  | 94.4(a',0.0)   |
| 95.8(a',0.0)   | 96.5(b <sub>2</sub> ,0.3)    | 92.6(a',0.4)   | 100.1 (a, 0.0) | 95.3(a",0.2)   |
| 98.5(a',0.0)   | 96.5(b <sub>1</sub> ,0.1)    | 94.0(a',0.0)   | 101.2 (a, 0.0) | 99.3(a",0.0)   |
| 103.9(a',0.0)  | 108.6(a <sub>1</sub> ,0.7)   | 104.2(a',0.0)  | 104.1 (a, 0.3) | 108.9(a',0.1)  |
| 112.6(a',0.2)  | 111.6(b <sub>1</sub> ,1.0)   | 108.7(a',0.0)  | 105.2 (a, 0.0) | 111.1(a",0.0)  |
| 115.9(a",0.0)  | 116.9(a <sub>2</sub> ,0.0)   | 117.1(a",0.1)  | 128.7 (a, 0.0) | 144.3(a',0.1)  |
| 155.7(a',0.1)  | 153.9(b <sub>2</sub> ,0.1)   | 127.1(a',2.8)  | 134.1 (a, 0.3) | 149.4(a",0.1)  |
| 163.4(a",0.0)  | 182.0(a <sub>1</sub> ,0.1)   | 140.8(a",0.1)  | 157.9 (a, 0.8) | 163.8(a",0.3)  |
| 173.9(a',0.4)  | 192.3(b <sub>1</sub> ,0.0)   | 151.8(a',1.2)  | 185.6 (a, 0.1) | 172.1(a',0.4)  |
| 207.6(a',0.2)  | 200.5(b <sub>1</sub> ,0.1)   | 168.4(a',2.1)  | 193.7 (a, 0.3) | 211.8(a',0.2)  |
| 210.7(a',1.1)  | 225.5(b <sub>1</sub> ,0.1)   | 209.0(a',0.5)  | 206.4 (a, 0.2) | 224.6(a",0.5)  |
| 235.9(a",0.0)  | 240.9(a <sub>1</sub> ,1.7)   | 234.3(a',1.3)  | 225.3 (a, 0.5) | 233.1(a',0.9)  |
| 250.2(a',0.1)  | 247.8(a <sub>2</sub> ,0.0)   | 242.8(a',1.3)  | 235.4 (a, 0.4) | 237.6(a",0.0)  |
| 262.1(a',0.2)  | 260.9(a <sub>1</sub> ,0.2)   | 245.5(a",0.1)  | 250.9 (a, 0.9) | 262.1(a',0.7)  |
| 337.0(a',1.0)  | 318.5(b <sub>1</sub> ,2.3)   | 343.3(a',9.1)  | 349.8 (a, 0.9) | 285.8(a",0.3)  |
| 352.2(a",0.2)  | 355.2(b <sub>1</sub> ,2.8)   | 363.0(a",0.5)  | 367.5 (a, 0.4) | 315.9(a",0.0)  |
| 357.3(a',3.6)  | 361.6(b <sub>2</sub> ,0.0)   | 368.6(a',0.0)  | 373.7 (a, 0.3) | 351.9(a',1.8)  |
| 375.1(a',3.2)  | 376.8(a <sub>1</sub> ,5.1)   | 380.9(a',2.6)  | 380.6 (a, 0.1) | 365.2(a",4.0)  |
| 376.0(a",0.0)  | 379.7(a <sub>2</sub> ,0.0)   | 382.8(a",0.4)  | 392.5 (a, 0.4) | 369.4(a',0.8)  |
| 380.7(a",0.3)  | 387.6(a <sub>1</sub> ,0.0)   | 393.9(a",1.8)  | 396.3 (a, 2.0) | 380.7(a',0.4)  |
| 393.2(a',18.9) | 397.5(b <sub>2</sub> ,0.8)   | 402.9(a",0.0)  | 407.6 (a, 4.9) | 386.7(a',4.4)  |
| 397.5(a",0.1)  | 406.7(a <sub>1</sub> ,9.0)   | 404.1(a',12.2) | 417.5 (a, 1.2) | 393.3(a",4.2)  |
| 414.2(a",0.2)  | 410.1(b <sub>2</sub> ,0.5)   | 409.7(a",0.2)  | 426.7 (a, 2.2) | 393.3(a',8.4)  |
| 425.4(a",0.2)  | 410.9(a <sub>2</sub> ,0.0)   | 415.4(a",0.0)  | 432.4 (a, 2.6) | 399.7(a",14.5) |
| 430.9(a',11.4) | 417.4(b <sub>1</sub> ,4.4)   | 435.0(a",0.6)  | 433.3 (a, 0.5) | 409.3(a",11.3) |
| 444.0(a",0.9)  | 421.6(b <sub>2</sub> ,0.7)   | 442.1(a',4.5)  | 441.6 (a, 4.5) | 421.3(a',2.9)  |
| 451.2(a',0.7)  | 427.3(a <sub>1</sub> ,6.3)   | 449.3(a",0.5)  | 448.6 (a, 2.3) | 426.4(a',2.6)  |
| 458.5(a",0.0)  | 436.6(b <sub>1</sub> ,11.0)  | 466.4(a",0.2)  | 468.0 (a, 0.1) | 431.9(a',0.2)  |
| 466.2(a",0.0)  | 442.9(b <sub>2</sub> ,0.8)   | 473.7(a',0.2)  | 478.4 (a, 2.6) | 451.8(a",0.1)  |
| 469.5(a',4.3)  | 463.5(a <sub>2</sub> ,0.0)   | 480.5(a",0.2)  | 488.3 (a, 4.6) | 464.7(a',0.9)  |
| 477.1(a",0.1)  | 476.2(a <sub>2</sub> ,0.0)   | 491.8(a',2.5)  | 493.4 (a, 1.0) | 474.0(a",6.0)  |
| 492.4(a",1.7)  | 482.2(b <sub>2</sub> ,0.0)   | 502.5(a',8.7)  | 502.9 (a, 2.6) | 479.0(a',6.0)  |
| 499.2(a',4.3)  | 489.8(a <sub>1</sub> ,102.7) | 502.5(a",3.3)  | 511.6 (a, 2.6) | 493.0(a",10.2) |
| 507.6(a',4.2)  | 502.5(b <sub>2</sub> ,0.6)   | 513.5(a',0.1)  | 514.4 (a, 5.9) | 503.0(a',2.9)  |
| 526.2(a',4.8)  | 502.5(a <sub>2</sub> ,0.0)   | 517.0(a",0.3)  | 522.2 (a, 2.2) | 514.2(a",4.8)  |
| 527.6(a",0.6)  | 520.3(b <sub>1</sub> ,24.9)  | 528.4(a',6.1)  | 532.7 (a, 0.0) | 517.6(a',0.4)  |
| 536.2(a',14.4) | 525.5(a <sub>1</sub> ,41.2)  | 537.0(a',13.3) | 544.6 (a, 9.8) | 535.8(a',5.5)  |

---

|                   |                                |                   |                    |                    |
|-------------------|--------------------------------|-------------------|--------------------|--------------------|
| 567.1(a',7.8)     | 549.1(a <sub>1</sub> ,9.4)     | 552.8(a',19.4)    | 559.4 (a, 3.7)     | 561.1(a',55.4)     |
| 568.9(a'',48.8)   | 563.0(b <sub>2</sub> ,13.7)    | 573.7(a'',26.8)   | 566.9 (a, 21.0)    | 570.3(a'',3.5)     |
| 578.3(a',46.1)    | 570.4(b <sub>1</sub> ,50.5)    | 578.4(a',48.3)    | 577.6 (a, 11.0)    | 572.4(a',37.4)     |
| 582.2(a'',3.7)    | 575.7(a <sub>2</sub> ,0.0)     | 582.7(a'',9.6)    | 587.5 (a, 20.1)    | 581.5(a',23.8)     |
| 599.8(a',76.8)    | 588.4(b <sub>2</sub> ,112.9)   | 596.1(a',98.1)    | 596.3 (a, 125.6)   | 591.5(a'',20.3)    |
| 610.3(a',80.0)    | 605.5(b <sub>1</sub> ,15.1)    | 599.5(a'',79.2)   | 600.5 (a, 125.0)   | 599.0(a',82.3)     |
| 610.9(a'',71.1)   | 610.9(a <sub>1</sub> ,87.1)    | 613.1(a',41.3)    | 617.9 (a, 27.7)    | 601.4(a'',39.6)    |
| 626.1(a',55.7)    | 625.4(a <sub>1</sub> ,121.8)   | 631.6(a',277.8)   | 631.8 (a, 73.0)    | 626.0(a'',159.5)   |
| 644.6(a',415.3)   | 649.2(b <sub>1</sub> ,321.7)   | 634.0(a',207.1)   | 636.3 (a, 138.9)   | 633.7(a',27.6)     |
| 652.3(a',151.9)   | 670.3(a <sub>1</sub> ,52.3)    | 655.5(a',44.4)    | 653.5 (a, 330.5)   | 650.5(a',387.4)    |
| 1307.8(a'',593.9) | 1317.6(b <sub>2</sub> ,594.1)  | 1307.6(a'',583.7) | 1190.9 (a, 196.1)  | 1311.8(a',253.6)   |
| 1322.7(a',22.5)   | 1338.4(a <sub>1</sub> ,136.0)  | 1324.9(a',10.3)   | 1318.2 (a, 381.4)  | 1346.3(a'',727.0)  |
| 1355.1(a',432.5)  | 1349.7(a <sub>1</sub> ,432.2)  | 1371.1(a',499.1)  | 1333.3 (a, 482.8)  | 1362.7(a',357.9)   |
| 1902.3(a',579.9)  | 1883.8(b <sub>1</sub> ,806.4)  | 1938.9(a',279.1)  | 1847.1 (a, 312.8)  | 1846.9(a',245.3)   |
| 1982.3(a'',121.4) | 1904.1(a <sub>1</sub> ,209.1)  | 1976.7(a'',383.3) | 1977.4 (a, 19.9)   | 1906.4(a',607.8)   |
| 1986.7(a'',783.2) | 1992.2(b <sub>2</sub> ,141.1)  | 1991.1(a'',542.4) | 1986.6 (a, 41.3)   | 1989.8(a'',4.0)    |
| 2001.5(a',23.2)   | 1998.3(a <sub>2</sub> ,0.0)    | 1997.0(a',50.2)   | 1992.7 (a, 233.8)  | 1993.5(a',661.4)   |
| 2004.2(a'',977.1) | 2003.1(b <sub>2</sub> ,1680.5) | 2006.1(a'',934.2) | 2002.3 (a, 1085.4) | 2001.6(a',1061.6)  |
| 2011.9(a',1928.3) | 2013.5(b <sub>1</sub> ,1958.1) | 2006.8(a',1977.7) | 2015.9 (a, 2000.1) | 2015.8(a',1757.6)  |
| 2019.5(a',1388.6) | 2021.7(a <sub>1</sub> ,1367.0) | 2025.1(a',1485.1) | 2024.3 (a, 1708.2) | 2018.2(a'',1471.5) |
| 2057.3(a',164.4)  | 2054.0(a <sub>1</sub> ,8.4)    | 2058.6(a',176.2)  | 2055.3 (a, 35.0)   | 2051.1(a',1.8)     |

---

**Table S2.** Theoretical harmonic vibrational frequencies (in  $\text{cm}^{-1}$ ) for optimized structures of  $\text{Fe}_3(\text{BF})_3(\text{CO})_8$  using the BP86/DZP method (infrared intensities in parentheses are in  $\text{km/mol}$ ).

| 8-6S( $C_s$ )  | 8-7S( $C_s$ )  | 8-1T( $C_s$ )  | 8-2T( $C_s$ )  | 8-3T( $C_s$ )    |
|----------------|----------------|----------------|----------------|------------------|
| 40.5i(a",0.0)  | 3.9i(a",0.0)   | 9.0(a",0.0)    | 20.9(a",0.0)   | 7.3 (a", 0.0)    |
| 27.1(a",0.0)   | 15.8(a",0.0)   | 35.5(a",0.0)   | 33.3(a",0.1)   | 34.6 (a", 0.0)   |
| 39.4(a',0.3)   | 34.2(a',0.1)   | 43.4(a",0.0)   | 44.5(a",0.0)   | 41.8 (a", 0.0)   |
| 41.2(a",0.0)   | 46.1(a",0.1)   | 56.6(a",0.1)   | 50.5(a',0.0)   | 51.4 (a', 0.3)   |
| 60.7(a",0.1)   | 48.0(a",0.4)   | 59.5(a',0.6)   | 54.0(a",0.1)   | 52.2 (a", 0.0)   |
| 64.3(a',0.0)   | 60.4(a',0.0)   | 61.5(a',0.1)   | 67.4(a',0.4)   | 68.7 (a', 0.4)   |
| 70.7(a",0.0)   | 69.9(a',0.3)   | 69.5(a",0.0)   | 73.0(a",0.0)   | 73.5 (a", 0.0)   |
| 74.6(a',0.2)   | 72.4(a",0.0)   | 79.0(a",0.4)   | 77.2(a",0.2)   | 77.5 (a", 0.3)   |
| 81.8(a",0.0)   | 85.0(a',0.4)   | 81.4(a',0.2)   | 79.4(a',0.6)   | 79.0 (a', 0.1)   |
| 83.7(a',0.5)   | 91.1(a",0.1)   | 83.0(a",0.0)   | 85.2(a',0.3)   | 83.4 (a', 0.0)   |
| 86.8(a',0.3)   | 93.5(a',0.1)   | 83.1(a',0.2)   | 85.5(a",0.0)   | 83.4 (a", 0.2)   |
| 86.9(a",0.5)   | 95.1(a',0.0)   | 85.5(a',0.2)   | 88.3(a',0.0)   | 89.7 (a', 0.3)   |
| 95.7(a',0.2)   | 95.5(a",0.0)   | 98.6(a',0.1)   | 89.9(a",0.2)   | 91.9 (a", 0.0)   |
| 103.8(a',0.2)  | 101.3(a",0.1)  | 100.4(a",0.0)  | 93.1(a',0.4)   | 96.6 (a', 0.1)   |
| 107.3(a",0.0)  | 101.4(a',0.1)  | 101.8(a',0.3)  | 101.1(a',0.5)  | 101.5 (a', 0.2)  |
| 109.0(a',0.9)  | 107.5(a',0.1)  | 107.2(a',0.0)  | 109.9(a',0.3)  | 112.9 (a", 0.0)  |
| 112.2(a",0.0)  | 112.9(a",0.1)  | 113.3(a",0.0)  | 116.7(a",0.0)  | 119.5 (a', 0.3)  |
| 147.1(a',0.6)  | 117.5(a',0.0)  | 131.3(a',0.3)  | 122.2(a',1.5)  | 161.4 (a', 0.6)  |
| 165.9(a",0.0)  | 126.4(a',0.1)  | 161.7(a',0.0)  | 139.3(a",0.1)  | 167.8 (a", 0.1)  |
| 170.2(a',0.1)  | 163.3(a",0.7)  | 174.0(a",0.0)  | 141.5(a',0.6)  | 169.1 (a', 0.2)  |
| 189.3(a',0.0)  | 183.7(a',0.4)  | 186.6(a',0.2)  | 165.3(a',0.4)  | 200.0 (a', 4.9)  |
| 201.2(a",0.1)  | 200.9(a",0.5)  | 210.9(a',0.2)  | 216.4(a',0.4)  | 205.0 (a', 0.9)  |
| 224.1(a',0.5)  | 223.9(a',1.2)  | 222.2(a",0.0)  | 231.0(a',0.2)  | 220.9 (a", 0.0)  |
| 233.8(a',0.4)  | 225.7(a",0.0)  | 231.2(a',0.1)  | 238.2(a",0.0)  | 224.8 (a', 0.8)  |
| 261.1(a',0.3)  | 249.3(a',0.9)  | 239.3(a',0.1)  | 241.5(a',1.9)  | 251.1 (a', 0.8)  |
| 294.2(a",0.0)  | 349.3(a",3.1)  | 316.0(a',7.9)  | 333.3(a",1.1)  | 306.6 (a', 1.7)  |
| 324.3(a",0.0)  | 364.3(a',2.4)  | 325.4(a",1.0)  | 355.8(a',9.6)  | 313.2 (a", 0.1)  |
| 352.7(a',7.5)  | 380.9(a",1.1)  | 357.0(a",0.1)  | 367.3(a',1.4)  | 339.4 (a', 1.9)  |
| 358.6(a",0.0)  | 382.8(a',2.6)  | 358.3(a',3.0)  | 378.0(a",0.1)  | 353.5 (a", 0.0)  |
| 371.9(a',2.3)  | 395.8(a",0.1)  | 372.0(a',3.1)  | 379.5(a',1.3)  | 369.2 (a", 1.8)  |
| 375.5(a",1.0)  | 400.6(a',0.7)  | 377.2(a',0.2)  | 386.2(a",0.9)  | 370.9 (a', 1.2)  |
| 387.1(a',0.8)  | 404.7(a",1.5)  | 379.4(a",0.6)  | 387.1(a",0.4)  | 384.1 (a', 10.0) |
| 389.4(a",0.0)  | 409.4(a',2.7)  | 388.0(a",0.2)  | 396.3(a",0.2)  | 389.8 (a", 0.2)  |
| 403.7(a",0.4)  | 420.3(a',0.5)  | 395.1(a",1.0)  | 403.2(a',5.4)  | 390.7 (a", 0.5)  |
| 408.9(a',0.9)  | 423.1(a",2.5)  | 411.3(a",0.3)  | 405.4(a",0.7)  | 407.2 (a', 16.7) |
| 423.3(a",1.0)  | 432.8(a",0.0)  | 416.5(a",0.1)  | 417.7(a",0.1)  | 409.5 (a", 0.0)  |
| 439.6(a",0.0)  | 438.4(a',1.3)  | 424.5(a',0.0)  | 437.7(a",1.0)  | 412.5 (a", 0.0)  |
| 447.9(a',3.2)  | 457.4(a",0.3)  | 437.2(a",0.0)  | 440.7(a',0.3)  | 427.6 (a", 0.1)  |
| 448.4(a",1.6)  | 472.5(a',0.2)  | 442.8(a",1.3)  | 442.0(a",0.1)  | 444.1 (a', 6.7)  |
| 452.6(a',11.6) | 472.7(a",0.4)  | 445.4(a',1.4)  | 463.6(a',0.3)  | 454.1 (a', 2.0)  |
| 463.0(a",0.5)  | 480.0(a",2.1)  | 469.1(a",0.5)  | 467.9(a",1.8)  | 458.2 (a", 0.8)  |
| 482.2(a',4.4)  | 483.6(a',1.0)  | 477.4(a',16.9) | 486.6(a',6.7)  | 463.4 (a", 0.3)  |
| 488.3(a",2.8)  | 504.2(a",13.5) | 480.7(a',0.2)  | 495.2(a',16.5) | 474.7 (a', 46.9) |
| 489.4(a',7.1)  | 504.2(a',8.9)  | 486.5(a',0.6)  | 496.7(a',6.6)  | 485.5 (a", 0.7)  |
| 513.1(a',6.8)  | 515.4(a',36.9) | 502.0(a',33.9) | 507.4(a",3.4)  | 495.6 (a', 5.9)  |

---

|                    |                    |                    |                   |                      |
|--------------------|--------------------|--------------------|-------------------|----------------------|
| 522.1(a',1.2)      | 524.7(a'',28.0)    | 508.1(a',1.3)      | 512.5(a'',0.6)    | 509.9 (a', 0.8)      |
| 526.5(a'',0.0)     | 535.0(a',1.4)      | 519.2(a',7.4)      | 516.0(a',16.0)    | 514.8 (a', 2.8)      |
| 535.6(a',0.5)      | 537.0(a'',49.0)    | 526.6(a'',0.0)     | 523.4(a',4.7)     | 520.6 (a'', 5.7)     |
| 554.7(a'',9.8)     | 548.8(a',23.1)     | 527.7(a',4.5)      | 537.2(a',4.7)     | 526.3 (a', 18.5)     |
| 555.5(a',3.9)      | 562.8(a'',4.7)     | 540.0(a'',15.8)    | 548.5(a',62.4)    | 535.5 (a'', 17.5)    |
| 562.4(a',46.3)     | 571.9(a',14.9)     | 555.0(a',24.2)     | 561.4(a'',11.9)   | 554.8 (a', 102.2)    |
| 582.1(a'',26.8)    | 587.7(a'',6.5)     | 563.4(a'',40.1)    | 566.8(a',68.4)    | 559.8 (a'', 29.5)    |
| 586.1(a',144.6)    | 600.2(a',111.1)    | 572.6(a',121.8)    | 568.5(a'',40.8)   | 572.6 (a', 66.5)     |
| 590.9(a',53.8)     | 603.4(a'',122.4)   | 591.2(a',55.5)     | 590.5(a'',58.2)   | 586.1 (a', 18.3)     |
| 592.3(a'',74.5)    | 611.3(a',73.4)     | 599.4(a'',63.7)    | 597.5(a',110.7)   | 598.9 (a'', 66.9)    |
| 613.5(a',41.8)     | 628.9(a',141.7)    | 606.5(a',53.3)     | 599.0(a',190.4)   | 600.3 (a', 132.4)    |
| 621.9(a',387.6)    | 630.3(a',83.1)     | 612.0(a',96.7)     | 609.9(a',121.4)   | 622.5 (a', 59.6)     |
| 639.0(a',185.6)    | 640.5(a'',248.8)   | 632.7(a',427.5)    | 630.0(a',175.6)   | 635.8 (a', 490.9)    |
| 1262.4(a'',465.4)  | 1296.3(a',222.3)   | 1293.7(a'',539.5)  | 1296.2(a'',500.9) | 1295.3 (a'', 520.4)  |
| 1287.2(a',17.3)    | 1314.2(a'',101.6)  | 1304.9(a',15.1)    | 1317.9(a',10.6)   | 1314.4 (a', 7.5)     |
| 1367.4(a',426.0)   | 1350.4(a',741.3)   | 1357.0(a',456.8)   | 1359.0(a',459.1)  | 1367.7 (a', 479.5)   |
| 1957.5(a',232.0)   | 1950.0(a'',0.3)    | 1949.8(a',335.1)   | 1968.3(a',72.3)   | 1891.9 (a', 480.2)   |
| 1963.2(a'',513.4)  | 1971.0(a'',99.7)   | 1973.2(a'',528.6)  | 1979.0(a'',63.7)  | 1983.8 (a'', 287.2)  |
| 1978.8(a',1.4)     | 1980.0(a',944.8)   | 1988.0(a',495.8)   | 1984.2(a'',998.5) | 1989.8 (a'', 578.0)  |
| 1991.5(a'',296.6)  | 1981.2(a'',416.5)  | 1992.4(a'',220.1)  | 1988.3(a',74.5)   | 1990.7 (a', 45.9)    |
| 1992.5(a',2023.6)  | 1987.5(a',17.3)    | 1998.7(a'',1290.4) | 1999.6(a',2296.8) | 2001.3 (a'', 1203.4) |
| 1998.8(a'',1299.8) | 2009.4(a'',1810.4) | 2002.3(a',1813.0)  | 2002.6(a'',968.3) | 2003.2 (a', 2083.9)  |
| 2011.5(a',1415.5)  | 2009.9(a',2157.8)  | 2011.9(a',1399.5)  | 2012.9(a',1533.6) | 2013.7 (a', 1498.8)  |
| 2049.5(a',201.1)   | 2047.4(a',88.7)    | 2053.5(a',213.0)   | 2054.1(a',174.0)  | 2052.3 (a', 77.8)    |

---

**Table S3.** Theoretical harmonic vibrational frequencies (in  $\text{cm}^{-1}$ ) for optimized structures of  $\text{Fe}_3(\text{BF})_3(\text{CO})_8$  using the BP86/DZP method (infrared intensities in parentheses are in  $\text{km/mol}$ ).

| 8-4T( $C_2$ ) | 8-5T( $C_{2v}$ )              | 8-6T( $C_3$ )  | 8-7T( $D_{3h}$ )            | 8-8T( $C_1$ ) |
|---------------|-------------------------------|----------------|-----------------------------|---------------|
| 103.0i(b,7.2) | 185.3i (a <sub>2</sub> , 0.0) | 10.4(a",0.1)   | 30.9(?a,0.0)                | 22.0(a,0.1)   |
| 18.6(b,0.0)   | 15.5i (b <sub>2</sub> , 0.0)  | 29.4(a',0.0)   | 30.9(?a,0.0)                | 28.9(a,0.0)   |
| 24.1(a,0.4)   | 36.4 (a <sub>2</sub> , 0.0)   | 43.0(a",0.0)   | 50.0(?a,0.0)                | 33.7(a,0.0)   |
| 37.3(a,0.1)   | 46.6 (b <sub>2</sub> , 0.0)   | 48.7(a',0.1)   | 50.0(?a,0.0)                | 41.4(a,0.0)   |
| 41.0(b,0.1)   | 55.9 (b <sub>2</sub> , 0.0)   | 55.3(a",0.0)   | 51.0(?a,0.0)                | 56.1(a,0.1)   |
| 64.2(a,0.3)   | 58.6 (a <sub>2</sub> , 0.0)   | 61.6(a",0.0)   | 51.7(?a,0.0)                | 64.6(a,0.0)   |
| 68.9(b,0.0)   | 63.7 (a <sub>1</sub> , 0.0)   | 61.9(a',0.2)   | 69.2(e',0.2)                | 71.3(a,0.1)   |
| 71.7(b,0.8)   | 66.6 (b <sub>1</sub> , 0.0)   | 73.3(a',0.3)   | 69.2(e',0.2)                | 78.9(a,0.1)   |
| 76.7(a,0.1)   | 77.2 (b <sub>2</sub> , 1.3)   | 78.0(a',0.2)   | 72.2(a <sub>2</sub> ",0.4)  | 85.2(a,0.1)   |
| 78.6(a,0.0)   | 84.0 (a <sub>1</sub> , 0.1)   | 90.2(a',0.1)   | 90.9(a <sub>1</sub> ',0.0)  | 90.1(a,0.2)   |
| 81.4(b,0.2)   | 85.0 (b <sub>1</sub> , 0.3)   | 90.7(a",0.5)   | 93.5(?b,0.0)                | 90.2(a,0.3)   |
| 89.9(b,0.0)   | 90.6 (a <sub>1</sub> , 0.0)   | 91.4(a",0.0)   | 94.6(?b,0.4)                | 92.4(a,0.3)   |
| 91.2(a,0.2)   | 93.3 (b <sub>2</sub> , 0.0)   | 95.9(a',0.1)   | 94.6(?b,0.4)                | 98.5(a,0.2)   |
| 97.6(b,0.2)   | 94.2 (b <sub>1</sub> , 0.1)   | 104.4(a",0.0)  | 113.5(e",0.0)               | 102.3(a,0.1)  |
| 106.8(a,0.1)  | 105.7 (a <sub>2</sub> , 0.0)  | 111.6(a',0.0)  | 113.5(e",0.0)               | 112.1(a,0.2)  |
| 108.5(a,0.0)  | 107.6 (a <sub>1</sub> , 0.2)  | 135.4(a",0.3)  | 131.9(e",0.0)               | 124.7(a,0.0)  |
| 109.0(b,0.3)  | 149.8 (b <sub>1</sub> , 0.4)  | 137.5(a',0.1)  | 131.9(e",0.0)               | 125.2(a,0.3)  |
| 129.7(b,0.2)  | 160.2 (b <sub>2</sub> , 0.1)  | 141.8(a",0.1)  | 135.2(e',0.1)               | 133.0(a,0.0)  |
| 140.9(a,0.9)  | 169.9 (a <sub>1</sub> , 0.1)  | 169.1(a",1.4)  | 135.2(e',0.1)               | 149.2(a,0.6)  |
| 182.1(b,0.1)  | 179.7 (b <sub>1</sub> , 1.4)  | 171.8(a',1.4)  | 181.1(e',1.2)               | 177.7(a,0.5)  |
| 195.8(a,0.7)  | 189.3 (a <sub>2</sub> , 0.0)  | 179.3(a',0.1)  | 181.1(e',1.2)               | 186.7(a,0.5)  |
| 196.8(b,0.3)  | 191.6 (b <sub>1</sub> , 3.1)  | 193.1(a",0.1)  | 221.9(e',5.4)               | 201.4(a,0.1)  |
| 202.4(a,0.0)  | 214.2 (a <sub>1</sub> , 0.0)  | 226.8(a',2.1)  | 221.9(e',5.4)               | 210.9(a,0.1)  |
| 225.8(b,0.0)  | 225.4 (a <sub>2</sub> , 0.0)  | 228.6(a",3.1)  | 233.3(a <sub>2</sub> ',0.0) | 222.7(a,1.3)  |
| 228.2(a,0.9)  | 246.7 (b <sub>1</sub> , 0.0)  | 258.6(a',1.2)  | 262.6(a <sub>1</sub> ',0.0) | 225.9(a,0.0)  |
| 290.1(b,3.3)  | 255.6 (a <sub>1</sub> , 0.3)  | 286.1(a',0.3)  | 297.4(e",0.0)               | 333.2(a,2.3)  |
| 314.1(b,4.1)  | 301.6 (b <sub>2</sub> , 0.3)  | 300.2(a",0.1)  | 297.5(e",0.0)               | 337.4(a,1.8)  |
| 315.3(a,1.3)  | 316.7 (b <sub>1</sub> , 0.6)  | 311.2(a",2.2)  | 313.7(a <sub>2</sub> ',0.0) | 371.2(a,3.5)  |
| 334.1(a,1.0)  | 318.8 (a <sub>1</sub> , 0.4)  | 345.3(a',1.3)  | 346.6(e',0.0)               | 372.9(a,2.7)  |
| 366.5(a,0.1)  | 323.9 (a <sub>2</sub> , 0.0)  | 353.9(a",0.2)  | 346.6(e',0.0)               | 382.1(a,0.6)  |
| 370.4(b,0.0)  | 346.6 (b <sub>1</sub> , 2.5)  | 376.4(a',1.1)  | 369.2(a <sub>1</sub> ',0.0) | 388.4(a,1.1)  |
| 386.4(b,0.8)  | 369.2 (b <sub>2</sub> , 0.8)  | 378.8(a',0.8)  | 378.4(a <sub>2</sub> ",0.2) | 393.7(a,0.2)  |
| 387.2(a,0.1)  | 372.4 (a <sub>1</sub> , 0.9)  | 381.1(a",0.4)  | 383.6(a <sub>1</sub> ',0.0) | 397.0(a,1.7)  |
| 399.4(b,0.1)  | 377.9 (a <sub>1</sub> , 8.3)  | 381.7(a',0.9)  | 392.2(e",0.0)               | 405.8(a,1.3)  |
| 407.5(a,0.4)  | 384.5 (a <sub>1</sub> , 0.1)  | 392.5(a',2.6)  | 392.2(e",0.0)               | 415.7(a,1.4)  |
| 408.2(b,1.2)  | 385.4 (b <sub>2</sub> , 0.0)  | 399.6(a',1.2)  | 395.3(e',0.3)               | 418.6(a,0.5)  |
| 419.8(a,0.0)  | 393.8 (b <sub>2</sub> , 2.1)  | 403.6(a",0.2)  | 395.3(e',0.3)               | 429.0(a,16.5) |
| 423.0(b,0.4)  | 408.1 (b <sub>1</sub> , 6.7)  | 423.7(a',0.9)  | 431.5(?C,7.1)               | 447.5(a,3.9)  |
| 431.9(a,16.2) | 417.6 (a <sub>2</sub> , 0.0)  | 425.1(a",11.8) | 443.4(?C,0.5)               | 453.7(a,0.1)  |
| 451.6(b,2.0)  | 422.8 (b <sub>2</sub> , 10.0) | 436.4(a",14.7) | 446.7(?C,0.0)               | 457.5(a,11.6) |
| 456.8(a,0.8)  | 433.8 (a <sub>1</sub> , 7.2)  | 439.4(a',2.5)  | 446.7(?C,0.0)               | 465.5(a,8.4)  |
| 457.8(b,2.2)  | 438.3 (b <sub>2</sub> , 4.6)  | 447.0(a",0.2)  | 448.9(?C,0.0)               | 474.4(a,1.8)  |
| 469.8(b,0.2)  | 443.2 (a <sub>2</sub> , 0.0)  | 449.5(a',1.1)  | 454.3(?C,0.0)               | 486.5(a,8.4)  |
| 474.8(a,18.2) | 451.5 (a <sub>2</sub> , 0.0)  | 455.3(a",8.9)  | 454.3(?C,0.0)               | 498.2(a,19.3) |
| 488.3(a,26.8) | 476.1 (b <sub>2</sub> , 5.0)  | 467.4(a',0.5)  | 487.5(e',29.7)              | 513.9(a,8.6)  |
| 491.2(b,59.7) | 484.3 (a <sub>1</sub> , 37.4) | 489.1(a',27.1) | 487.5(e',29.7)              | 515.3(a,0.6)  |

---

|                  |                                  |                   |                                 |                  |
|------------------|----------------------------------|-------------------|---------------------------------|------------------|
| 510.3(b,1.8)     | 508.9 (b <sub>1</sub> , 1.4)     | 512.6(a",63.7)    | 528.3(e',117.1)                 | 518.4(a,3.6)     |
| 511.8(a,0.1)     | 509.1 (b <sub>2</sub> , 19.9)    | 522.7(a',43.1)    | 528.4(e',117.1)                 | 526.5(a,3.3)     |
| 519.0(b,6.6)     | 528.1 (a <sub>1</sub> , 1.0)     | 534.3(a',73.7)    | 532.0(a <sub>1</sub> ',0.0)     | 532.1(a,6.2)     |
| 525.7(a,6.2)     | 534.6 (b <sub>1</sub> , 0.4)     | 543.1(a",1.2)     | 557.9(?D,0.0)                   | 539.1(a,17.5)    |
| 546.6(b,51.5)    | 554.3 (a <sub>2</sub> , 0.0)     | 552.7(a',38.4)    | 557.9(?D,0.0)                   | 564.4(a,95.1)    |
| 560.4(a,33.4)    | 559.4 (b <sub>1</sub> , 145.5)   | 564.0(a',59.9)    | 559.9(?D,118.8)                 | 572.2(a,25.3)    |
| 579.9(a,0.7)     | 571.2 (a <sub>1</sub> , 138.8)   | 568.5(a",49.3)    | 569.2(?b,76.2)                  | 581.6(a,44.4)    |
| 589.4(b,49.1)    | 578.8 (b <sub>2</sub> , 82.6)    | 570.3(a',57.5)    | 569.2(?b,76.2)                  | 589.6(a,40.1)    |
| 594.1(b,110.1)   | 588.4 (a <sub>1</sub> , 0.8)     | 581.8(a",13.4)    | 576.1(?b,0.0)                   | 591.5(a,75.0)    |
| 599.8(a,150.3)   | 591.0 (b <sub>1</sub> , 18.9)    | 606.3(a",175.1)   | 613.4(e',194.7)                 | 601.0(a,50.1)    |
| 627.1(a,60.2)    | 623.7 (a <sub>1</sub> , 90.0)    | 611.6(a',89.1)    | 613.4(e',194.6)                 | 620.2(a,124.6)   |
| 633.2(b,482.9)   | 631.1 (b <sub>1</sub> , 396.7)   | 625.3(a',125.3)   | 621.8(a <sub>1</sub> ',0.0)     | 635.5(a,187.9)   |
| 1302.6(b,629.1)  | 1325.2 (b <sub>2</sub> , 598.0)  | 1331.4(a',250.7)  | 1362.1(e',830.1)                | 1157.4(a,219.1)  |
| 1311.8(a,7.1)    | 1333.9 (a <sub>1</sub> , 48.5)   | 1354.6(a",789.7)  | 1362.1(e',830.1)                | 1321.0(a,293.9)  |
| 1362.5(a,486.5)  | 1354.2 (a <sub>1</sub> , 508.8)  | 1374.2(a',366.5)  | 1393.2(a <sub>1</sub> ',0.0)    | 1342.3(a,601.9)  |
| 1951.7(a,6.4)    | 1892.2 (b <sub>1</sub> , 812.2)  | 1803.3(a',245.4)  | 1776.4(a <sub>2</sub> ",473.3)  | 1969.2(a,112.1)  |
| 1957.5(b,447.1)  | 1907.0 (a <sub>1</sub> , 218.9)  | 1906.6(a',498.7)  | 1796.9(a <sub>1</sub> ',0.0)    | 1972.3(a,22.5)   |
| 1975.9(b,501.6)  | 1980.6 (b <sub>2</sub> , 717.8)  | 1986.9(a",40.7)   | 1988.8(e",0.0)                  | 1982.8(a,309.2)  |
| 1994.2(a,246.9)  | 1992.9 (a <sub>2</sub> , 0.0)    | 1989.1(a',47.8)   | 1988.8(e",0.0)                  | 1985.4(a,550.7)  |
| 1999.6(a,2051.7) | 1997.7 (b <sub>2</sub> , 1301.0) | 1994.6(a',1796.8) | 1994.5(a <sub>2</sub> ",1796.2) | 1996.4(a,722.0)  |
| 2000.3(b,1477.2) | 2010.3 (a <sub>1</sub> , 1880.5) | 2004.7(a",1794.1) | 2008.4(e',1593.6)               | 2008.0(a,2026.5) |
| 2014.9(b,1518.2) | 2012.0 (b <sub>1</sub> , 1625.3) | 2008.1(a',1661.9) | 2008.4(e',1593.4)               | 2014.3(a,1796.3) |
| 2050.7(a,20.9)   | 2048.0 (a <sub>1</sub> , 1.7)    | 2043.5(a',6.8)    | 2040.2(a <sub>1</sub> ',0.0)    | 2056.3(a,302.0)  |

---

**Table S4.** Theoretical Cartesian coordinates (in Å) for the structure **8-1S** ( $C_s$ ) using the B3LYP/DZP method

Standard orientation:

| Center<br>Number | Atomic<br>Number | Atomic<br>Type | Coordinates (Angstroms) |           |           |
|------------------|------------------|----------------|-------------------------|-----------|-----------|
|                  |                  |                | X                       | Y         | Z         |
| 1                | 6                | 0              | 2.635587                | -0.163713 | 1.272294  |
| 2                | 8                | 0              | 3.427778                | -0.268163 | 2.106846  |
| 3                | 26               | 0              | 1.407626                | 0.031779  | 0.000000  |
| 4                | 5                | 0              | -0.413049               | 0.090969  | 1.466737  |
| 5                | 9                | 0              | -0.435759               | 0.099247  | 2.777282  |
| 6                | 5                | 0              | -0.413049               | 0.090969  | -1.466737 |
| 7                | 26               | 0              | -0.378519               | 1.449128  | 0.000000  |
| 8                | 6                | 0              | -1.214508               | 2.458344  | -1.235908 |
| 9                | 8                | 0              | -1.735931               | 3.137874  | -2.012077 |
| 10               | 9                | 0              | -0.435759               | 0.099247  | -2.777282 |
| 11               | 26               | 0              | -0.940359               | -1.196044 | 0.000000  |
| 12               | 6                | 0              | -2.656393               | -0.635543 | 0.000000  |
| 13               | 8                | 0              | -3.765787               | -0.318317 | 0.000000  |
| 14               | 6                | 0              | 2.635587                | -0.163713 | -1.272294 |
| 15               | 8                | 0              | 3.427778                | -0.268163 | -2.106846 |
| 16               | 5                | 0              | 1.061078                | -1.820251 | 0.000000  |
| 17               | 9                | 0              | 1.622268                | -2.995010 | 0.000000  |
| 18               | 6                | 0              | -1.113860               | -2.346650 | 1.371575  |
| 19               | 8                | 0              | -1.248857               | -3.107945 | 2.229489  |
| 20               | 6                | 0              | -1.113860               | -2.346650 | -1.371575 |
| 21               | 8                | 0              | -1.248857               | -3.107945 | -2.229489 |
| 22               | 6                | 0              | 1.357810                | 2.113517  | 0.000000  |
| 23               | 8                | 0              | 2.113026                | 3.008550  | 0.000000  |
| 24               | 6                | 0              | -1.214508               | 2.458344  | 1.235908  |
| 25               | 8                | 0              | -1.735931               | 3.137874  | 2.012077  |



**Table S5.** Theoretical Cartesian coordinates (in Å) for the structure **8-2S** ( $C_{2v}$ ) using the B3LYP/DZP method.

Standard orientation:

| Center<br>Number | Atomic<br>Number | Atomic<br>Type | Coordinates (Angstroms) |           |           |
|------------------|------------------|----------------|-------------------------|-----------|-----------|
|                  |                  |                | X                       | Y         | Z         |
| 1                | 26               | 0              | 1.266694                | 0.000000  | -0.644499 |
| 2                | 26               | 0              | -1.266694               | 0.000000  | -0.644499 |
| 3                | 26               | 0              | 0.000000                | 0.000000  | 1.473085  |
| 4                | 6                | 0              | -2.354830               | 1.293281  | -1.244051 |
| 5                | 6                | 0              | 0.000000                | 1.253145  | 2.744619  |
| 6                | 6                | 0              | 2.354830                | 1.293281  | -1.244051 |
| 7                | 6                | 0              | -2.354830               | -1.293281 | -1.244051 |
| 8                | 6                | 0              | 2.354830                | -1.293281 | -1.244051 |
| 9                | 6                | 0              | 0.000000                | -1.253145 | 2.744619  |
| 10               | 8                | 0              | -3.085066               | 2.087563  | -1.657522 |
| 11               | 8                | 0              | 0.000000                | 2.081163  | 3.546824  |
| 12               | 8                | 0              | 3.085066                | 2.087563  | -1.657522 |
| 13               | 9                | 0              | 0.000000                | 0.000000  | -3.459266 |
| 14               | 8                | 0              | -3.085066               | -2.087563 | -1.657522 |
| 15               | 8                | 0              | 3.085066                | -2.087563 | -1.657522 |
| 16               | 8                | 0              | 0.000000                | -2.081163 | 3.546824  |
| 17               | 5                | 0              | 0.000000                | -1.519296 | -0.456340 |
| 18               | 5                | 0              | 0.000000                | 1.519296  | -0.456340 |
| 19               | 9                | 0              | 0.000000                | 2.829609  | -0.501897 |
| 20               | 9                | 0              | 0.000000                | -2.829609 | -0.501897 |
| 21               | 6                | 0              | -1.955508               | 0.000000  | 1.223795  |
| 22               | 6                | 0              | 1.955508                | 0.000000  | 1.223795  |
| 23               | 8                | 0              | -2.958312               | 0.000000  | 1.828332  |
| 24               | 8                | 0              | 2.958312                | 0.000000  | 1.828332  |
| 25               | 5                | 0              | 0.000000                | 0.000000  | -2.156168 |

**Table S6.** Theoretical Cartesian coordinates (in Å) for the structure **8-3S** ( $C_s$ ) using the B3LYP/DZP method

Standard orientation:

| Center<br>Number | Atomic<br>Number | Atomic<br>Type | Coordinates (Angstroms) |           |           |
|------------------|------------------|----------------|-------------------------|-----------|-----------|
|                  |                  |                | X                       | Y         | Z         |
| 1                | 5                | 0              | 0.505262                | 0.300665  | 1.484652  |
| 2                | 9                | 0              | 0.512280                | 0.295951  | 2.798583  |
| 3                | 26               | 0              | 1.148023                | -0.837324 | 0.000000  |
| 4                | 6                | 0              | 2.323215                | -1.332261 | -1.250488 |
| 5                | 8                | 0              | 3.088278                | -1.706757 | -2.034981 |
| 6                | 26               | 0              | 0.149823                | 1.574156  | 0.000000  |
| 7                | 6                | 0              | -0.479173               | 2.586244  | -1.363193 |
| 8                | 8                | 0              | -0.855230               | 3.272702  | -2.211178 |
| 9                | 26               | 0              | -1.237868               | -0.761078 | 0.000000  |
| 10               | 6                | 0              | -2.143267               | -1.605011 | -1.283549 |
| 11               | 8                | 0              | -2.691025               | -2.161543 | -2.132708 |
| 12               | 5                | 0              | 0.083186                | -2.346208 | 0.000000  |
| 13               | 9                | 0              | -0.022372               | -3.646805 | 0.000000  |
| 14               | 6                | 0              | 2.323215                | -1.332261 | 1.250488  |
| 15               | 8                | 0              | 3.088278                | -1.706757 | 2.034981  |
| 16               | 5                | 0              | 0.505262                | 0.300665  | -1.484652 |
| 17               | 9                | 0              | 0.512280                | 0.295951  | -2.798583 |
| 18               | 6                | 0              | 1.804422                | 2.211488  | 0.000000  |
| 19               | 8                | 0              | 2.879681                | 2.634555  | 0.000000  |
| 20               | 6                | 0              | -0.479173               | 2.586244  | 1.363193  |
| 21               | 8                | 0              | -0.855230               | 3.272702  | 2.211178  |
| 22               | 6                | 0              | -2.263376               | 0.750368  | 0.000000  |
| 23               | 8                | 0              | -3.176632               | 1.467907  | 0.000000  |
| 24               | 6                | 0              | -2.143267               | -1.605011 | 1.283549  |
| 25               | 8                | 0              | -2.691025               | -2.161543 | 2.132708  |

**Table S7.** Theoretical Cartesian coordinates (in Å) for the structure **8-4S** ( $C_1$ ) using the B3LYP/DZP method.

Standard orientation:

| Center<br>Number | Atomic<br>Number | Atomic<br>Type | Coordinates (Angstroms) |           |           |
|------------------|------------------|----------------|-------------------------|-----------|-----------|
|                  |                  |                | X                       | Y         | Z         |
| 1                | 6                | 0              | 1.216755                | -2.686242 | 0.595883  |
| 2                | 8                | 0              | 1.328308                | -3.679268 | 1.175148  |
| 3                | 26               | 0              | 1.036538                | -1.146267 | -0.282131 |
| 4                | 6                | 0              | 0.030583                | -1.386058 | -1.760310 |
| 5                | 8                | 0              | -0.798744               | -1.450989 | -2.590531 |
| 6                | 26               | 0              | 0.308497                | 1.441053  | 0.033335  |
| 7                | 6                | 0              | -0.786901               | 2.142980  | -1.220243 |
| 8                | 8                | 0              | -1.449431               | 2.655125  | -2.019156 |
| 9                | 26               | 0              | -1.397517               | -0.650087 | -0.318064 |
| 10               | 6                | 0              | -3.040658               | -0.038980 | -0.749125 |
| 11               | 8                | 0              | -4.100914               | 0.329212  | -1.012250 |
| 12               | 5                | 0              | 1.752178                | 0.277437  | 0.832645  |
| 13               | 9                | 0              | 2.821578                | 0.518370  | 1.557305  |
| 14               | 5                | 0              | 0.003399                | -0.329197 | 1.215368  |
| 15               | 9                | 0              | -0.117058               | -0.551745 | 2.543705  |
| 16               | 6                | 0              | 2.720535                | -1.188879 | -0.916723 |
| 17               | 8                | 0              | 3.804145                | -1.228647 | -1.313716 |
| 18               | 5                | 0              | -1.450450               | 0.855379  | 0.849269  |
| 19               | 9                | 0              | -2.331399               | 1.404372  | 1.654730  |
| 20               | 6                | 0              | 1.764543                | 1.921541  | -0.916720 |
| 21               | 8                | 0              | 2.685017                | 2.279925  | -1.516635 |
| 22               | 6                | 0              | 0.388029                | 2.725530  | 1.263087  |
| 23               | 8                | 0              | 0.443218                | 3.553972  | 2.065236  |
| 24               | 6                | 0              | -2.079693               | -2.049034 | 0.536182  |
| 25               | 8                | 0              | -2.511394               | -2.929881 | 1.144166  |

**Table S8.** Theoretical Cartesian coordinates (in Å) for the structure **8-5S** ( $C_s$ ) using the B3LYP/DZP method

Standard orientation:

| Center<br>Number | Atomic<br>Number | Atomic<br>Type | Coordinates (Angstroms) |           |           |
|------------------|------------------|----------------|-------------------------|-----------|-----------|
|                  |                  |                | X                       | Y         | Z         |
| 1                | 6                | 0              | 1.240815                | -1.548894 | 2.150622  |
| 2                | 8                | 0              | 2.075897                | -2.040298 | 2.780116  |
| 3                | 26               | 0              | -0.050287               | -0.815208 | 1.173524  |
| 4                | 6                | 0              | -0.332628               | -2.386218 | 0.000000  |
| 5                | 8                | 0              | -0.516742               | -3.540774 | 0.000000  |
| 6                | 26               | 0              | -0.094661               | 1.462037  | 0.000000  |
| 7                | 6                | 0              | -1.634923               | 0.424334  | 0.000000  |
| 8                | 8                | 0              | -2.794922               | 0.225727  | 0.000000  |
| 9                | 5                | 0              | 0.161676                | 0.997873  | 1.936397  |
| 10               | 9                | 0              | 0.416579                | 1.568471  | 3.075002  |
| 11               | 6                | 0              | -1.268046               | -1.174742 | 2.451448  |
| 12               | 8                | 0              | -2.026640               | -1.428645 | 3.282422  |
| 13               | 5                | 0              | 1.416873                | 0.182376  | 0.000000  |
| 14               | 9                | 0              | 2.729953                | 0.182429  | 0.000000  |
| 15               | 26               | 0              | -0.050287               | -0.815208 | -1.173524 |
| 16               | 6                | 0              | 1.240815                | -1.548894 | -2.150622 |
| 17               | 8                | 0              | 2.075897                | -2.040298 | -2.780116 |
| 18               | 6                | 0              | -1.268046               | -1.174742 | -2.451448 |
| 19               | 8                | 0              | -2.026640               | -1.428645 | -3.282422 |
| 20               | 5                | 0              | 0.161676                | 0.997873  | -1.936397 |
| 21               | 9                | 0              | 0.416579                | 1.568471  | -3.075002 |
| 22               | 6                | 0              | 1.288266                | 2.591374  | 0.000000  |
| 23               | 8                | 0              | 2.132107                | 3.383217  | 0.000000  |
| 24               | 6                | 0              | -1.221096               | 2.863498  | 0.000000  |
| 25               | 8                | 0              | -1.914453               | 3.787043  | 0.000000  |

**Table S9.** Theoretical Cartesian coordinates (in Å) for the structure **8-6S** ( $C_s$ ) using the B3LYP/DZP method

Standard orientation:

| Center Number | Atomic Number | Atomic Type | Coordinates (Angstroms) |           |           |
|---------------|---------------|-------------|-------------------------|-----------|-----------|
|               |               |             | X                       | Y         | Z         |
| 1             | 6             | 0           | 1.752487                | -1.880530 | 1.461234  |
| 2             | 8             | 0           | 2.099748                | -2.514854 | 2.363968  |
| 3             | 26            | 0           | 1.227418                | -0.958307 | 0.000000  |
| 4             | 5             | 0           | 0.201239                | 0.145119  | 1.469853  |
| 5             | 9             | 0           | 0.187384                | 0.126255  | 2.793129  |
| 6             | 5             | 0           | 0.201239                | 0.145119  | -1.469853 |
| 7             | 26            | 0           | 0.463338                | 1.505352  | 0.000000  |
| 8             | 6             | 0           | 0.144659                | 2.620919  | -1.388383 |
| 9             | 8             | 0           | -0.045085               | 3.369147  | -2.246716 |
| 10            | 9             | 0           | 0.187384                | 0.126255  | -2.793129 |
| 11            | 26            | 0           | -1.251321               | -0.402978 | 0.000000  |
| 12            | 6             | 0           | -2.179845               | 1.143457  | 0.000000  |
| 13            | 8             | 0           | -2.932566               | 2.024804  | 0.000000  |
| 14            | 6             | 0           | 1.752487                | -1.880530 | -1.461234 |
| 15            | 8             | 0           | 2.099748                | -2.514854 | -2.363968 |
| 16            | 5             | 0           | -0.336473               | -2.140278 | 0.000000  |
| 17            | 9             | 0           | -0.575601               | -3.416253 | 0.000000  |
| 18            | 6             | 0           | -2.128017               | -1.043238 | 1.425753  |
| 19            | 8             | 0           | -2.740797               | -1.470475 | 2.309435  |
| 20            | 6             | 0           | -2.128017               | -1.043238 | -1.425753 |
| 21            | 8             | 0           | -2.740797               | -1.470475 | -2.309435 |
| 22            | 6             | 0           | 2.220109                | 1.710744  | 0.000000  |
| 23            | 8             | 0           | 3.377464                | 1.768452  | 0.000000  |
| 24            | 6             | 0           | 0.144659                | 2.620919  | 1.388383  |
| 25            | 8             | 0           | -0.045085               | 3.369147  | 2.246716  |

**Table S10.** Theoretical Cartesian coordinates (in Å) for the structure **8-7S** ( $C_s$ ) using the B3LYP/DZP method.

Standard orientation:

| Center<br>Number | Atomic<br>Number | Atomic<br>Type | Coordinates (Angstroms) |           |           |
|------------------|------------------|----------------|-------------------------|-----------|-----------|
|                  |                  |                | X                       | Y         | Z         |
| 1                | 6                | 0              | -0.510769               | -0.459156 | 3.018218  |
| 2                | 8                | 0              | -0.415930               | -0.834383 | 4.109095  |
| 3                | 26               | 0              | -0.688234               | 0.116185  | 1.348039  |
| 4                | 6                | 0              | -0.197526               | 1.856486  | 1.489570  |
| 5                | 8                | 0              | 0.148799                | 2.956504  | 1.604047  |
| 6                | 26               | 0              | -0.688234               | 0.116185  | -1.348039 |
| 7                | 6                | 0              | -0.197526               | 1.856486  | -1.489570 |
| 8                | 8                | 0              | 0.148799                | 2.956504  | -1.604047 |
| 9                | 26               | 0              | 1.478104                | 0.308613  | 0.000000  |
| 10               | 6                | 0              | 2.750286                | 0.273234  | -1.257329 |
| 11               | 8                | 0              | 3.579712                | 0.210232  | -2.059225 |
| 12               | 5                | 0              | -1.240152               | -1.236108 | 0.000000  |
| 13               | 9                | 0              | -1.910324               | -2.367865 | 0.000000  |
| 14               | 5                | 0              | 0.781901                | -1.150747 | 1.126107  |
| 15               | 9                | 0              | 1.262891                | -2.278950 | 1.586298  |
| 16               | 6                | 0              | -2.466039               | 0.266251  | 1.570420  |
| 17               | 8                | 0              | -3.607040               | 0.337182  | 1.738496  |
| 18               | 5                | 0              | 0.781901                | -1.150747 | -1.126107 |
| 19               | 9                | 0              | 1.262891                | -2.278950 | -1.586298 |
| 20               | 6                | 0              | -2.466039               | 0.266251  | -1.570420 |
| 21               | 8                | 0              | -3.607040               | 0.337182  | -1.738496 |
| 22               | 6                | 0              | -0.510769               | -0.459156 | -3.018218 |
| 23               | 8                | 0              | -0.415930               | -0.834383 | -4.109095 |
| 24               | 6                | 0              | 2.750286                | 0.273234  | 1.257329  |
| 25               | 8                | 0              | 3.579712                | 0.210232  | 2.059225  |

**Table S11.** Theoretical Cartesian coordinates (in Å) for the structure **8-1T** ( $C_s$ ) using the B3LYP/DZP method

Standard orientation:

| Center<br>Number | Atomic<br>Number | Atomic<br>Type | Coordinates (Angstroms) |           |           |
|------------------|------------------|----------------|-------------------------|-----------|-----------|
|                  |                  |                | X                       | Y         | Z         |
| 1                | 6                | 0              | 2.004148                | -1.716642 | 1.419806  |
| 2                | 8                | 0              | 2.501256                | -2.278660 | 2.296959  |
| 3                | 26               | 0              | 1.236090                | -0.836175 | 0.000000  |
| 4                | 5                | 0              | -0.075068               | 0.270512  | 1.465575  |
| 5                | 9                | 0              | -0.062561               | 0.207541  | 2.779799  |
| 6                | 5                | 0              | -0.075068               | 0.270512  | -1.465575 |
| 7                | 26               | 0              | 0.473874                | 1.491473  | 0.000000  |
| 8                | 6                | 0              | 0.137294                | 2.701264  | -1.305779 |
| 9                | 8                | 0              | -0.045676               | 3.504579  | -2.115950 |
| 10               | 9                | 0              | -0.062561               | 0.207541  | -2.779799 |
| 11               | 26               | 0              | -1.344973               | -0.458429 | 0.000000  |
| 12               | 6                | 0              | -2.446664               | 0.966864  | 0.000000  |
| 13               | 8                | 0              | -3.203815               | 1.838856  | 0.000000  |
| 14               | 6                | 0              | 2.004148                | -1.716642 | -1.419806 |
| 15               | 8                | 0              | 2.501256                | -2.278660 | -2.296959 |
| 16               | 5                | 0              | -0.142440               | -2.166237 | 0.000000  |
| 17               | 9                | 0              | -0.372729               | -3.443509 | 0.000000  |
| 18               | 6                | 0              | -2.151559               | -1.248467 | 1.398918  |
| 19               | 8                | 0              | -2.701337               | -1.765126 | 2.274205  |
| 20               | 6                | 0              | -2.151559               | -1.248467 | -1.398918 |
| 21               | 8                | 0              | -2.701337               | -1.765126 | -2.274205 |
| 22               | 6                | 0              | 2.253785                | 1.484054  | 0.000000  |
| 23               | 8                | 0              | 3.411888                | 1.580050  | 0.000000  |
| 24               | 6                | 0              | 0.137294                | 2.701264  | 1.305779  |
| 25               | 8                | 0              | -0.045676               | 3.504579  | 2.115950  |

**Table S12.** Theoretical Cartesian coordinates (in Å) for the structure **8-2T** ( $C_s$ ) using the B3LYP/DZP method

Standard orientation:

| Center<br>Number | Atomic<br>Number | Atomic<br>Type | Coordinates (Angstroms) |           |           |
|------------------|------------------|----------------|-------------------------|-----------|-----------|
|                  |                  |                | X                       | Y         | Z         |
| 1                | 5                | 0              | 0.583088                | 0.317716  | 1.503485  |
| 2                | 9                | 0              | 0.514813                | 0.279780  | 2.815517  |
| 3                | 26               | 0              | 1.224234                | -0.863982 | 0.000000  |
| 4                | 6                | 0              | 2.006394                | -1.705439 | -1.397174 |
| 5                | 8                | 0              | 2.502131                | -2.276016 | -2.272144 |
| 6                | 26               | 0              | 0.396326                | 1.566765  | 0.000000  |
| 7                | 6                | 0              | -0.270210               | 2.568518  | -1.342910 |
| 8                | 8                | 0              | -0.686428               | 3.248535  | -2.178855 |
| 9                | 26               | 0              | -1.279266               | -0.582259 | 0.000000  |
| 10               | 6                | 0              | -2.120716               | -1.377741 | -1.411037 |
| 11               | 8                | 0              | -2.663164               | -1.896999 | -2.288630 |
| 12               | 5                | 0              | -0.134290               | -2.245261 | 0.000000  |
| 13               | 9                | 0              | -0.273592               | -3.536671 | 0.000000  |
| 14               | 6                | 0              | 2.006394                | -1.705439 | 1.397174  |
| 15               | 8                | 0              | 2.502131                | -2.276016 | 2.272144  |
| 16               | 5                | 0              | 0.583088                | 0.317716  | -1.503485 |
| 17               | 9                | 0              | 0.514813                | 0.279780  | -2.815517 |
| 18               | 6                | 0              | 2.051788                | 2.207433  | 0.000000  |
| 19               | 8                | 0              | 3.132945                | 2.617962  | 0.000000  |
| 20               | 6                | 0              | -0.270210               | 2.568518  | 1.342910  |
| 21               | 8                | 0              | -0.686428               | 3.248535  | 2.178855  |
| 22               | 6                | 0              | -2.391021               | 0.854502  | 0.000000  |
| 23               | 8                | 0              | -3.211468               | 1.670230  | 0.000000  |
| 24               | 6                | 0              | -2.120716               | -1.377741 | 1.411037  |
| 25               | 8                | 0              | -2.663164               | -1.896999 | 2.288630  |



**Table S13.** Theoretical Cartesian coordinates (in Å) for the structure **8-3T** ( $C_s$ ) using the B3LYP/DZP method

Standard orientation:

| Center<br>Number | Atomic<br>Number | Atomic<br>Type | Coordinates (Angstroms) |           |           |
|------------------|------------------|----------------|-------------------------|-----------|-----------|
|                  |                  |                | X                       | Y         | Z         |
| 1                | 26               | 0              | -0.764289               | -1.323187 | 0.000000  |
| 2                | 26               | 0              | 1.327524                | 0.281334  | 0.000000  |
| 3                | 26               | 0              | -0.817730               | 1.311429  | 0.000000  |
| 4                | 6                | 0              | 2.500339                | 0.186528  | 1.366420  |
| 5                | 6                | 0              | -1.408700               | 2.382836  | 1.373281  |
| 6                | 6                | 0              | -0.749122               | -2.477266 | 1.376195  |
| 7                | 6                | 0              | 2.500339                | 0.186528  | -1.366420 |
| 8                | 6                | 0              | -0.749122               | -2.477266 | -1.376195 |
| 9                | 6                | 0              | -1.408700               | 2.382836  | -1.373281 |
| 10               | 8                | 0              | 3.283930                | 0.136132  | 2.214917  |
| 11               | 8                | 0              | -1.754716               | 3.080948  | 2.225018  |
| 12               | 8                | 0              | -0.761272               | -3.253996 | 2.231650  |
| 13               | 9                | 0              | 2.035752                | -2.700708 | 0.000000  |
| 14               | 8                | 0              | 3.283930                | 0.136132  | -2.214917 |
| 15               | 8                | 0              | -0.761272               | -3.253996 | -2.231650 |
| 16               | 8                | 0              | -1.754716               | 3.080948  | -2.225018 |
| 17               | 5                | 0              | -0.401229               | 0.011806  | -1.493750 |
| 18               | 5                | 0              | -0.401229               | 0.011806  | 1.493750  |
| 19               | 9                | 0              | -0.358207               | -0.009685 | 2.805864  |
| 20               | 9                | 0              | -0.358207               | -0.009685 | -2.805864 |
| 21               | 6                | 0              | 1.233169                | 2.171826  | 0.000000  |
| 22               | 6                | 0              | -2.547188               | -1.065410 | 0.000000  |
| 23               | 8                | 0              | 1.662854                | 3.252475  | 0.000000  |
| 24               | 8                | 0              | -3.697771               | -0.961705 | 0.000000  |
| 25               | 5                | 0              | 1.304259                | -1.625107 | 0.000000  |

**Table S14.** Theoretical Cartesian coordinates (in Å) for the structure **8-4T** ( $C_2$ ) using the B3LYP/DZP method

Standard orientation:

| Center<br>Number | Atomic<br>Number | Atomic<br>Type | Coordinates (Angstroms) |           |           |
|------------------|------------------|----------------|-------------------------|-----------|-----------|
|                  |                  |                | X                       | Y         | Z         |
| 1                | 26               | 0              | -1.295134               | -0.046072 | -0.598877 |
| 2                | 26               | 0              | 1.295134                | 0.046072  | -0.598877 |
| 3                | 26               | 0              | 0.000000                | 0.000000  | 1.682430  |
| 4                | 6                | 0              | 2.066851                | -1.356950 | -1.413556 |
| 5                | 6                | 0              | 0.498671                | -1.448213 | 2.758071  |
| 6                | 6                | 0              | -1.998209               | -1.444485 | -1.462895 |
| 7                | 6                | 0              | 1.998209                | 1.444485  | -1.462895 |
| 8                | 6                | 0              | -2.066851               | 1.356950  | -1.413556 |
| 9                | 6                | 0              | -0.498671               | 1.448213  | 2.758071  |
| 10               | 8                | 0              | 2.606178                | -2.224134 | -1.956432 |
| 11               | 8                | 0              | 0.801615                | -2.335370 | 3.427128  |
| 12               | 8                | 0              | -2.486953               | -2.325321 | -2.031835 |
| 13               | 9                | 0              | 0.000000                | 0.000000  | -3.406796 |
| 14               | 8                | 0              | 2.486953                | 2.325321  | -2.031835 |
| 15               | 8                | 0              | -2.606178               | 2.224134  | -1.956432 |
| 16               | 8                | 0              | -0.801615               | 2.335370  | 3.427128  |
| 17               | 5                | 0              | 0.000000                | 1.450744  | 0.189718  |
| 18               | 5                | 0              | 0.000000                | -1.450744 | 0.189718  |
| 19               | 9                | 0              | 0.045610                | -2.772148 | 0.195767  |
| 20               | 9                | 0              | -0.045610               | 2.772148  | 0.195767  |
| 21               | 6                | 0              | 2.483473                | 0.078862  | 0.753393  |
| 22               | 6                | 0              | -2.483473               | -0.078862 | 0.753393  |
| 23               | 8                | 0              | 3.340728                | 0.111808  | 1.533479  |
| 24               | 8                | 0              | -3.340728               | -0.111808 | 1.533479  |
| 25               | 5                | 0              | 0.000000                | 0.000000  | -2.107800 |

**Table S15.** Theoretical Cartesian coordinates (in Å) for the structure **8-5T** ( $C_{2v}$ ) using the B3LYP/DZP method

Standard orientation:

| Center<br>Number | Atomic<br>Number | Atomic<br>Type | Coordinates (Angstroms) |           |           |
|------------------|------------------|----------------|-------------------------|-----------|-----------|
|                  |                  |                | X                       | Y         | Z         |
| 1                | 26               | 0              | 1.285318                | 0.000000  | -0.646432 |
| 2                | 26               | 0              | -1.285318               | 0.000000  | -0.646432 |
| 3                | 26               | 0              | 0.000000                | 0.000000  | 1.456533  |
| 4                | 6                | 0              | -2.294565               | 1.307693  | -1.346191 |
| 5                | 6                | 0              | 0.000000                | 1.312375  | 2.817559  |
| 6                | 6                | 0              | 2.294565                | 1.307693  | -1.346191 |
| 7                | 6                | 0              | -2.294565               | -1.307693 | -1.346191 |
| 8                | 6                | 0              | 2.294565                | -1.307693 | -1.346191 |
| 9                | 6                | 0              | 0.000000                | -1.312375 | 2.817559  |
| 10               | 8                | 0              | -2.975167               | 2.116539  | -1.812790 |
| 11               | 8                | 0              | 0.000000                | 2.041736  | 3.707886  |
| 12               | 8                | 0              | 2.975167                | 2.116539  | -1.812790 |
| 13               | 9                | 0              | 0.000000                | 0.000000  | -3.459719 |
| 14               | 8                | 0              | -2.975167               | -2.116539 | -1.812790 |
| 15               | 8                | 0              | 2.975167                | -2.116539 | -1.812790 |
| 16               | 8                | 0              | 0.000000                | -2.041736 | 3.707886  |
| 17               | 5                | 0              | 0.000000                | -1.507403 | -0.245746 |
| 18               | 5                | 0              | 0.000000                | 1.507403  | -0.245746 |
| 19               | 9                | 0              | 0.000000                | 2.816023  | -0.228497 |
| 20               | 9                | 0              | 0.000000                | -2.816023 | -0.228497 |
| 21               | 6                | 0              | -2.086825               | 0.000000  | 1.092419  |
| 22               | 6                | 0              | 2.086825                | 0.000000  | 1.092419  |
| 23               | 8                | 0              | -3.040168               | 0.000000  | 1.769852  |
| 24               | 8                | 0              | 3.040168                | 0.000000  | 1.769852  |
| 25               | 5                | 0              | 0.000000                | 0.000000  | -2.158628 |

**Table S16** Theoretical Cartesian coordinates (in Å) for the structure **8-6T** ( $C_s$ ) using the B3LYP/DZP method

Standard orientation:

| Center<br>Number | Atomic<br>Number | Atomic<br>Type | Coordinates (Angstroms) |           |           |
|------------------|------------------|----------------|-------------------------|-----------|-----------|
|                  |                  |                | X                       | Y         | Z         |
| 1                | 6                | 0              | 1.497937                | 1.326701  | 2.132497  |
| 2                | 8                | 0              | 1.977955                | 2.184587  | 2.743667  |
| 3                | 26               | 0              | 0.766146                | -0.052250 | 1.257428  |
| 4                | 6                | 0              | 2.297617                | -0.476426 | 0.000000  |
| 5                | 8                | 0              | 3.433502                | -0.747307 | 0.000000  |
| 6                | 26               | 0              | -1.420901               | -0.136703 | 0.000000  |
| 7                | 6                | 0              | -0.531690               | -1.745727 | 0.000000  |
| 8                | 8                | 0              | -0.246058               | -2.874187 | 0.000000  |
| 9                | 5                | 0              | -1.021594               | 0.103705  | 1.991790  |
| 10               | 9                | 0              | -1.701187               | 0.299728  | 3.081932  |
| 11               | 6                | 0              | 1.265591                | -1.244134 | 2.550140  |
| 12               | 8                | 0              | 1.578673                | -1.931733 | 3.422509  |
| 13               | 5                | 0              | 0.164650                | 1.417404  | 0.000000  |
| 14               | 9                | 0              | 0.034042                | 2.720859  | 0.000000  |
| 15               | 26               | 0              | 0.766146                | -0.052250 | -1.257428 |
| 16               | 6                | 0              | 1.497937                | 1.326701  | -2.132497 |
| 17               | 8                | 0              | 1.977955                | 2.184587  | -2.743667 |
| 18               | 6                | 0              | 1.265591                | -1.244134 | -2.550140 |
| 19               | 8                | 0              | 1.578673                | -1.931733 | -3.422509 |
| 20               | 5                | 0              | -1.021594               | 0.103705  | -1.991790 |
| 21               | 9                | 0              | -1.701187               | 0.299728  | -3.081932 |
| 22               | 6                | 0              | -2.471657               | 1.331897  | 0.000000  |
| 23               | 8                | 0              | -3.209481               | 2.219994  | 0.000000  |
| 24               | 6                | 0              | -2.927614               | -1.096467 | 0.000000  |
| 25               | 8                | 0              | -3.910062               | -1.704972 | 0.000000  |

**Table S17.** Theoretical Cartesian coordinates (in Å) for the structure **8-7T** ( $D_{3h}$ ) using the B3LYP/DZP method.

Standard orientation:

| Center<br>Number | Atomic<br>Number | Atomic<br>Type | Coordinates (Angstroms) |           |           |
|------------------|------------------|----------------|-------------------------|-----------|-----------|
|                  |                  |                | X                       | Y         | Z         |
| 1                | 6                | 0              | 0.000000                | 2.699081  | 1.275756  |
| 2                | 8                | 0              | 0.000000                | 3.547043  | 2.060383  |
| 3                | 26               | 0              | 0.000000                | 1.433135  | 0.000000  |
| 4                | 26               | 0              | -1.241131               | -0.716567 | 0.000000  |
| 5                | 6                | 0              | 0.000000                | 0.000000  | -1.503092 |
| 6                | 8                | 0              | 0.000000                | 0.000000  | -2.683622 |
| 7                | 5                | 0              | -1.992037               | 1.150103  | 0.000000  |
| 8                | 9                | 0              | -3.113237               | 1.797428  | 0.000000  |
| 9                | 6                | 0              | 0.000000                | 2.699081  | -1.275756 |
| 10               | 8                | 0              | 0.000000                | 3.547043  | -2.060383 |
| 11               | 26               | 0              | 1.241131                | -0.716567 | 0.000000  |
| 12               | 6                | 0              | 2.337473                | -1.349541 | 1.275756  |
| 13               | 8                | 0              | 3.071829                | -1.773521 | 2.060383  |
| 14               | 6                | 0              | 2.337473                | -1.349541 | -1.275756 |
| 15               | 8                | 0              | 3.071829                | -1.773521 | -2.060383 |
| 16               | 5                | 0              | 0.000000                | -2.300206 | 0.000000  |
| 17               | 9                | 0              | 0.000000                | -3.594857 | 0.000000  |
| 18               | 6                | 0              | -2.337473               | -1.349541 | 1.275756  |
| 19               | 8                | 0              | -3.071829               | -1.773521 | 2.060383  |
| 20               | 6                | 0              | -2.337473               | -1.349541 | -1.275756 |
| 21               | 8                | 0              | -3.071829               | -1.773521 | -2.060383 |
| 22               | 6                | 0              | 0.000000                | 0.000000  | 1.503092  |
| 23               | 8                | 0              | 0.000000                | 0.000000  | 2.683622  |
| 24               | 5                | 0              | 1.992037                | 1.150103  | 0.000000  |
| 25               | 9                | 0              | 3.113237                | 1.797428  | 0.000000  |

**Table S18.** Theoretical Cartesian coordinates (in Å) for the structure **8-8T** ( $C_1$ ) using the B3LYP/DZP method.

Standard orientation:

| Center<br>Number | Atomic<br>Number | Atomic<br>Type | Coordinates (Angstroms) |           |           |
|------------------|------------------|----------------|-------------------------|-----------|-----------|
|                  |                  |                | X                       | Y         | Z         |
| 1                | 6                | 0              | 2.970707                | -1.030409 | 0.080334  |
| 2                | 8                | 0              | 4.114022                | -1.183841 | -0.015229 |
| 3                | 26               | 0              | 1.216890                | -0.846171 | 0.250146  |
| 4                | 6                | 0              | 1.328294                | -0.472221 | 2.028696  |
| 5                | 8                | 0              | 1.497250                | -0.206111 | 3.140772  |
| 6                | 26               | 0              | -1.430773               | -0.485026 | 0.014957  |
| 7                | 6                | 0              | -1.440578               | -0.829429 | 1.810706  |
| 8                | 8                | 0              | -1.573552               | -1.047034 | 2.937534  |
| 9                | 26               | 0              | 0.228469                | 1.551771  | -0.086788 |
| 10               | 6                | 0              | -0.950179               | 2.566180  | 0.891537  |
| 11               | 8                | 0              | -1.697910               | 3.217169  | 1.483308  |
| 12               | 5                | 0              | 0.051483                | -0.386208 | -1.390259 |
| 13               | 9                | 0              | 0.063925                | -0.698339 | -2.710791 |
| 14               | 5                | 0              | 1.695674                | 0.466095  | -1.071654 |
| 15               | 9                | 0              | 2.615778                | 0.801742  | -1.950197 |
| 16               | 6                | 0              | 0.991888                | -2.635252 | 0.105733  |
| 17               | 8                | 0              | 0.880214                | -3.777000 | -0.021058 |
| 18               | 5                | 0              | -1.360251               | 0.924430  | -1.244447 |
| 19               | 9                | 0              | -1.967945               | 1.604584  | -2.181508 |
| 20               | 6                | 0              | -1.875150               | -2.049351 | -0.731346 |
| 21               | 8                | 0              | -2.189290               | -3.034003 | -1.244871 |
| 22               | 6                | 0              | -3.120366               | 0.090814  | 0.054393  |
| 23               | 8                | 0              | -4.221883               | 0.442321  | 0.059606  |
| 24               | 6                | 0              | 1.606507                | 2.756861  | -0.061217 |
| 25               | 8                | 0              | 2.467858                | 3.524555  | -0.039427 |

Table 19 Wiberg bond indices from NBO analysis for 8-1S, 9-1S and Fe(BF)(CO)<sub>4</sub>.

|                         |       | $(Fe-CO)_t$        | $(Fe1-CO)_{\mu 2}$ | $(Fe2-CO)_{\mu 2}$ | $(Fe2-BF)_{\mu 2}$ | $(Fe3-BF)_{\mu 2}$ | $(Fe1-BF)_{\mu 3}$ |
|-------------------------|-------|--------------------|--------------------|--------------------|--------------------|--------------------|--------------------|
| <b>8-1S</b>             | B3LYP | 1.15±0.05          | 0.94               | 0.58               | 0.69               | 0.50               | 0.52               |
|                         | BP86  | 1.22±0.05          | 0.91               | 0.63               | 0.67               | 0.50               | 0.51               |
| <b>9-1S</b>             | B3LYP | 1.13±0.05          |                    |                    | 0.58               | 0.58               | 0.66,0.32          |
|                         | BP86  | 1.20±0.3           |                    |                    | 0.57               | 0.57               | 0.61,0.37          |
| Fe(BF)(CO) <sub>4</sub> | B3LYP | 1.24±0.05          |                    |                    | 1.13               |                    |                    |
|                         | BP86  | 1.27±0.05          |                    |                    | 1.10               |                    |                    |
| conti                   |       | $(Fe2-BF)_{\mu 3}$ | $(Fe3-BF)_{\mu 3}$ | (Fe1-Fe2)          | (Fe1-Fe3)          | (Fe2-Fe3)          |                    |
| <b>8-1S</b>             | B3LYP | 0.26               | 0.55               | 0.69               | 0.27               | 0.26               |                    |
|                         | BP86  | 0.26               | 0.54               | 0.67               | 0.27               | 0.27               |                    |
| <b>9-1S</b>             | B3LYP | 0.51,0.39          | 0.51,0.39          | 0.34               | 0.34               | 0.30               |                    |
|                         | BP86  | 0.40,0.48          | 0.40,0.48          | 0.33               | 0.33               | 0.30               |                    |

**Complete Gaussian 03 reference (reference 44)**

Frisch, M. J.; Trucks, G. W.; Schlegel, H. B.; Scuseria, G. E.; Robb, M. A.; Cheeseman, J. R.; Montgomery, Jr., J. A.; Vreven, T.; Kudin, K. N.; Burant, J. C.; Millam, J. M.; Iyengar, S. S.; Tomasi, J.; Barone, V.; Mennucci, B.; Cossi, M.; Scalmani, G.; Rega, N.; Petersson, G. A.; Nakatsuji, H.; Hada, M.; Ehara, M.; Toyota, K.; Fukuda, R.; Hasegawa, J.; Ishida, M.; Nakajima, T.; Honda, Y.; Kitao, O.; Nakai, H.; Klene, M.; Li, X.; Knox, J. E.; Hratchian, H. P.; Cross, J. B.; Bakken, V.; Adamo, C.; Jaramillo, J.; Gomperts, R.; Stratmann, R. E.; Yazyev, O.; Austin, A. J.; Cammi, R.; Pomelli, C.; Ochterski, J. W.; Ayala, P. Y.; Morokuma, K.; Voth, G. A.; Salvador, P.; Dannenberg, J. J.; Zakrzewski, V. G.; Dapprich, S.; Daniels, A. D.; Strain, M. C.; Farkas, O.; Malick, D. K.; Rabuck, A. D.; Raghavachari, K.; Foresman, J. B.; Ortiz, J. V.; Cui, Q.; Baboul, A. G.; Clifford, S.; Cioslowski, J.; Stefanov, B. B.; Liu, G.; Liashenko, A.; Piskorz, P.; Komaromi, I.; Martin, R. L.; Fox, D. J.; Keith, T.; Al-Laham, M. A.; Peng, C. Y.; Nanayakkara, A.; Challacombe, M.; Gill, P. M. W.; Johnson, B.; Chen, W.; Wong, M. W.; Gonzalez, C.; and Pople, J. A. Gaussian 03, Revision D.01 Inc., Wallingford CT, 2004.
